# Supplementary material for: Virtual sounding of solar-wind effects on the AU and AL indices based on an echo state network model
Source: Copernicus journal article supplement (doi:10.5194/angeo-2021-54), 2021-09-20

We conducted an experiment with synthetic solar wind inputs where one of the parameters was varied in a square-wave form. The figure below shows the result of the experiment. IMF  $B_z$  was repeatedly switched between  $-5$  nT and  $1$  nT with a period of 20 minute, 2 hours, and 6 hours in Day 1–2, 3–4, and 5–6 (the first, second, and third two days), respectively, while the solar wind speed was fixed at  $400$  km/s. Similarly, IMF  $B_z$  was switched between  $-5$  nT and  $1$  nT with a period of 20 minute, 2 hours, and 6 hours in Day 7–8, 9–10, and 11–12, while the solar wind speed was constant at  $800$  km/s. From Day 13, IMF  $B_z$  was fixed at  $-5$  nT. In Day 13–14, 15–16, and 17–18, the solar wind speed was switched between  $400$  km/s and  $800$  km/s with a period of 20 minute, 2 hours, and 6 hours, respectively. In Day 19–20, 21–22, and 23–24, the solar wind density was switched between  $2$ /cc and  $8$ /cc with a period of 20 minute, 2 hours, and 6 hours, respectively, while IMF  $B_z$  was  $1$  nT. Again, the solar wind density was switched between  $2$ /cc and  $8$ /cc with a period of 20 minute, 2 hours, and 6 hours in Day 25–26, 27–28, and 29–30 while IMF  $B_z$  was fixed at  $-5$  nT.

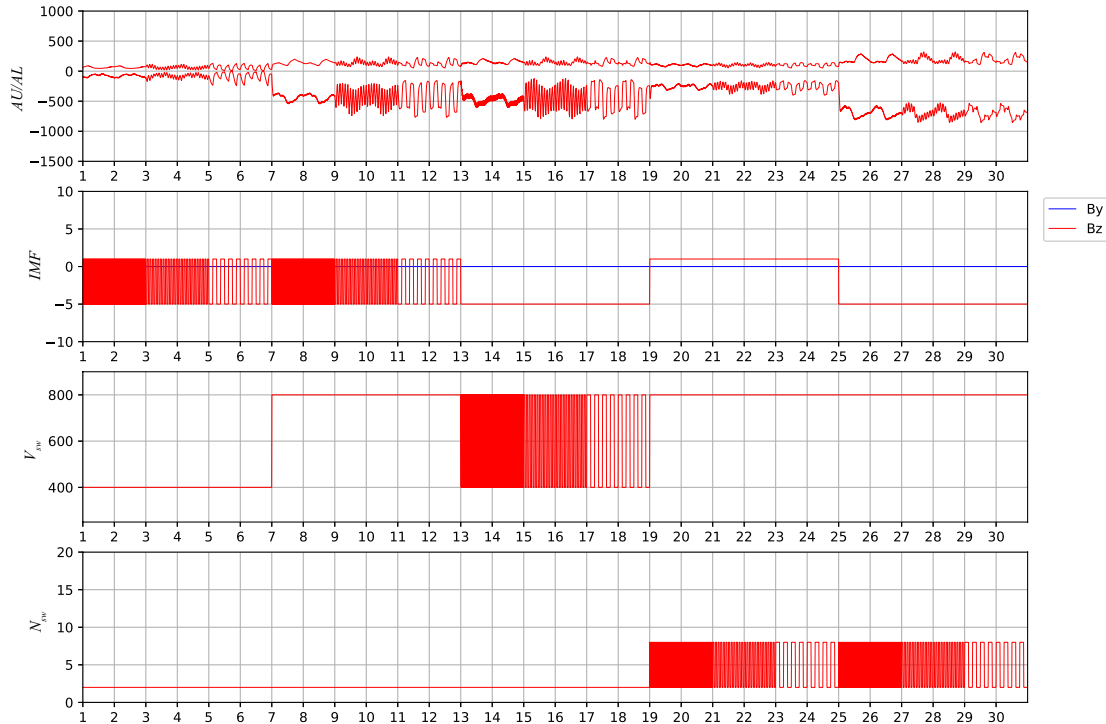

Supplement: Supplementary file [file angeo-2021-54-AC1-supplement.pdf]
